# Supplementary material for: Elevating Ascorbate in Arabidopsis Stimulates the Production of Abscisic Acid, Phaseic Acid, and to a Lesser Extent Auxin (IAA) and Jasmonates, Resulting in Increased Expression of DHAR1 and Multiple Transcription Factors Associated with Abiotic Stress Tolerance
Source: MDPI journal article supplement (doi:10.3390/ijms22136743), 2021-06-23
Supplement: s1 [file s1]

**Elevating ascorbate in *Arabidopsis* stimulates the production of abscisic acid, phaseic acid, and to a lesser auxin (IAA) and jasmonates, resulting in increased expression of DHAR1 and multiple transcription factors associated with abiotic stress tolerance.**

Sean M. Bulley, Janine M. Cooney, and William Laing

Supplementary data

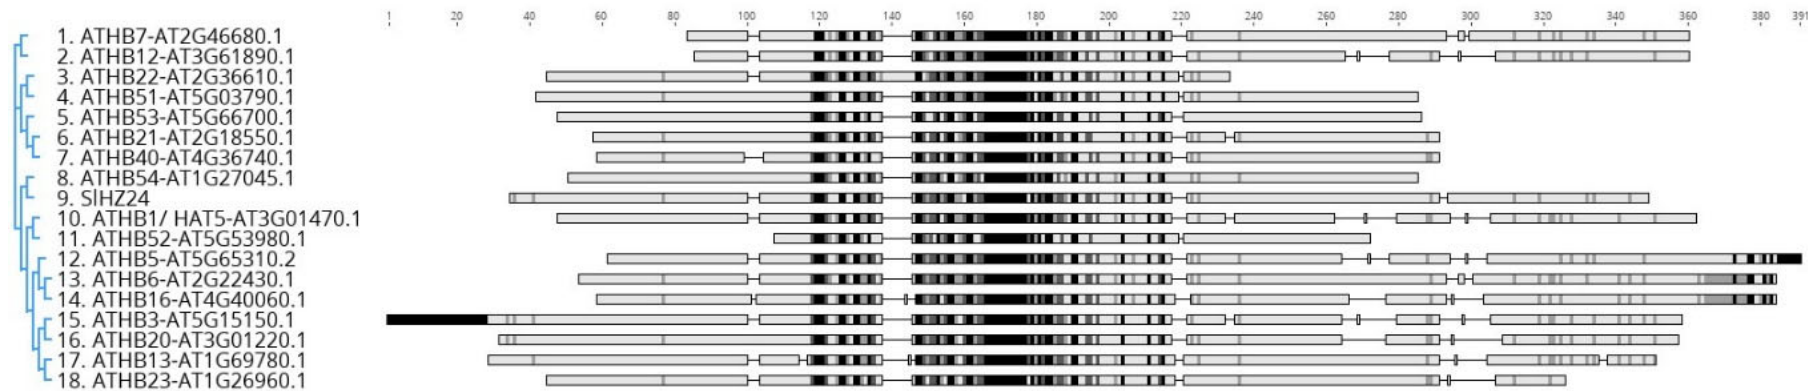

Supplementary Figure S1: Arabidopsis protein alignments with SIHZ24. Genes where expression was measured are numbered 1, 2, 8, 10, 11, 13, and 14 in figure. Alignment tree generated using Geneious version 10.0 (Biomatters; <http://www.geneious.com>).
